# Supplementary material
Source: Research Square preprint supplement (doi:10.21203/rs.3.rs-12088/v3)
Supplement: Supplementary file 1 [file 40473216eb951f6e515b479b.docx]

**ROC CURVE FOR TOTAL BILIRUBIN VS COMPLICATED APPENDICITIS WITH RELATED CALCULATIONS BELOW-**

0

20

40

60

80

100

Bilirubin_Total__mg_dl

0

20

40

60

80

100

100 - Specificity

Sensitivity

AUC = 0.958

P < 0.001
